# Supplementary material for: Trends and perceptions of choosing chemistry as a major and a career
Source: Royal Society of Chemistry journal article supplement (doi:10.1039/c9rp00158a), 2020-01-01
Supplement: c9rp00158a1.pdf [file c9rp00158a1.pdf]

### Examples of Items - Chemistry Career Choice (C3) Perceptions Questionnaire

| Factor and examples of items                                                                                                                                                                                                                                                                                                                                                                                                                                                         | 1 Don't agree at all | 2 | 3 | 4 | 5 Strongly agree |
|--------------------------------------------------------------------------------------------------------------------------------------------------------------------------------------------------------------------------------------------------------------------------------------------------------------------------------------------------------------------------------------------------------------------------------------------------------------------------------------|----------------------|---|---|---|------------------|
| <p>Factor 1<br/> <b>Theme – Personal</b><br/>                     Self-efficacy – scientific/chemistry learning</p> <ul style="list-style-type: none"> <li>• I have the ability to understand research processes in chemistry</li> <li>• I have the ability to conduct a successful career in the chemistry domain</li> <li>• I have the ability to read and understand scientific articles</li> <li>• I have the ability to follow and understand scientific innovations</li> </ul> |                      |   |   |   |                  |
| <p>Factor 2<br/> <b>Theme – Personal</b><br/>                     Self-efficacy – task oriented</p> <ul style="list-style-type: none"> <li>• I have the ability to handle challenging tasks in my job</li> <li>• I have the ability to critically evaluate information and propose a course of action</li> <li>• I have the ability to meet deadlines</li> </ul>                                                                                                                     |                      |   |   |   |                  |
| <p>Factor 3<br/> <b>Theme – Personal</b><br/>                     Self-efficacy – confidence in one's career</p> <ul style="list-style-type: none"> <li>• I lack self-confidence in my potential for achieving my chosen occupation</li> <li>• I am not sure about my ability to balance my future career and family</li> <li>• I have tensions regarding my ability to pursue a career in chemistry</li> </ul>                                                                      |                      |   |   |   |                  |

|                                                                                                       |                                                                                                                                                                                                                                                                                                     |  |  |  |  |  |
|-------------------------------------------------------------------------------------------------------|-----------------------------------------------------------------------------------------------------------------------------------------------------------------------------------------------------------------------------------------------------------------------------------------------------|--|--|--|--|--|
| <p>Factor 4<br/> <b>Theme – Environmental</b><br/> Extrinsic motivation – rewards/status/prestige</p> | <ul style="list-style-type: none"> <li>• There is no financial compensation in a chemistry career</li> <li>• My job allows me an adequate salary</li> <li>• Working in chemistry allows high social status</li> </ul>                                                                               |  |  |  |  |  |
| <p>Factor 5<br/> <b>Theme – Environmental</b><br/> Influence of teachers/lecturers</p>                | <ul style="list-style-type: none"> <li>• My teacher/lecturer was interested in my progress in chemistry</li> <li>• My teacher/lecturer have made me feel that I have the ability to continue in science</li> <li>• My teacher/lecturer encouraged me to read advanced chemistry articles</li> </ul> |  |  |  |  |  |
| <p>Factor 6<br/> <b>Theme – Environmental</b><br/> Family and friends</p>                             | <ul style="list-style-type: none"> <li>• I am interested in a job that will consider my family status</li> <li>• I have a lot of time to spend with my family and my kids</li> <li>• I am encouraged by people surrounding me to continue to study chemistry</li> </ul>                             |  |  |  |  |  |
